# Supplementary material for: Predicting the Potential Suitable Area of the Invasive Ant Linepithema humile in China under Future Climatic Scenarios Based on Optimized MaxEnt
Source: MDPI journal article supplement (doi:10.3390/d14110921), 2022-10-28
Supplement: s1 [file s1]

Archive with 1 entries (1 files):
- diversity-1932669-supplementary.pdf
