# Supplementary material for: Predicting the Potential Suitable Area of the Invasive Ant Linepithema humile in China under Future Climatic Scenarios Based on Optimized MaxEnt
Source: MDPI journal article supplement (doi:10.3390/d14110921), 2022-10-28
Supplement: s1 [file s1 › diversity-1932669-supplementary.pdf]

## Supplementary material

Table S1. Three emission scenarios.

| Emission | Description                                                                                                                                                         |
|----------|---------------------------------------------------------------------------------------------------------------------------------------------------------------------|
| SSP1-2.6 | SSP1 (Low forcing scenario) Upgrade to RCP2.6 scenario based on (Radiative forcing reaches 2.6 W/m <sup>2</sup> in 2100)                                            |
| SSP2-4.5 | SSP2 (Medium forcing scenario) Upgrade to RCP4.5 scenario based on (Radiative forcing reaches 4.5 W/m <sup>2</sup> in 2100)                                         |
| SSP5-8.5 | SSP5 (High Forcing Scenario) Upgrade to RCP8.5 scenario based on (SSP5 is the only SSP scenario that can achieve radiative forcing to 8.5 W/m <sup>2</sup> in 2100) |

Table S2. Potential suitable areas for *Linepithema humile* under different climate change scenarios (10<sup>4</sup> km<sup>2</sup>).

| Period          | Highly | Moderately | Poorly | Total  |
|-----------------|--------|------------|--------|--------|
| Current         | 0.18   | 6.37       | 73.76  | 80.31  |
| 2030s, SSP1-2.6 | 0.54   | 9.22       | 94.84  | 104.60 |
| 2030s, SSP2-4.5 | 0.59   | 11.07      | 90.84  | 102.50 |
| 2030s, SSP5-8.5 | 0.87   | 7.22       | 89.60  | 97.69  |
| 2050s, SSP1-2.6 | 0.76   | 13.43      | 101.91 | 116.10 |
| 2050s, SSP2-4.5 | 0.49   | 15.73      | 78.81  | 95.03  |
| 2050s, SSP5-8.5 | 1.12   | 4.26       | 67.66  | 73.04  |

Table S3. Future changes in suitable area (10<sup>4</sup>km<sup>2</sup>).

| Period          | Loss  | Gain  | Unchanged |
|-----------------|-------|-------|-----------|
| 2030s, SSP1-2.6 | 9.24  | 33.21 | 71.26     |
| 2030s, SSP2-4.5 | 9.45  | 31.56 | 70.95     |
| 2030s, SSP5-8.5 | 11.78 | 28.91 | 68.72     |
| 2050s, SSP1-2.6 | 7.59  | 43.10 | 72.91     |
| 2050s, SSP2-4.5 | 16.56 | 31.23 | 63.85     |
| 2050s, SSP5-8.5 | 26.11 | 18.92 | 54.22     |

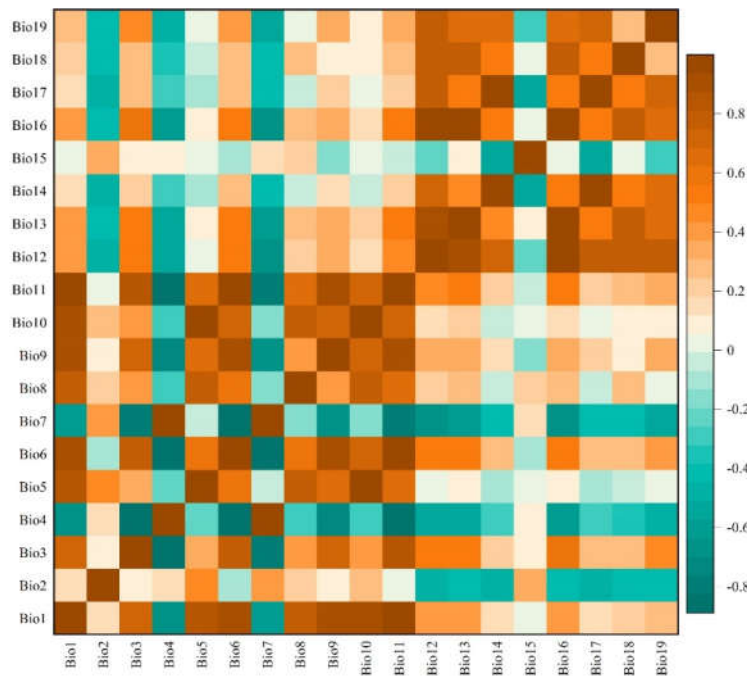

Figure S1. Correlation coefficient between Bioclimatic variables.

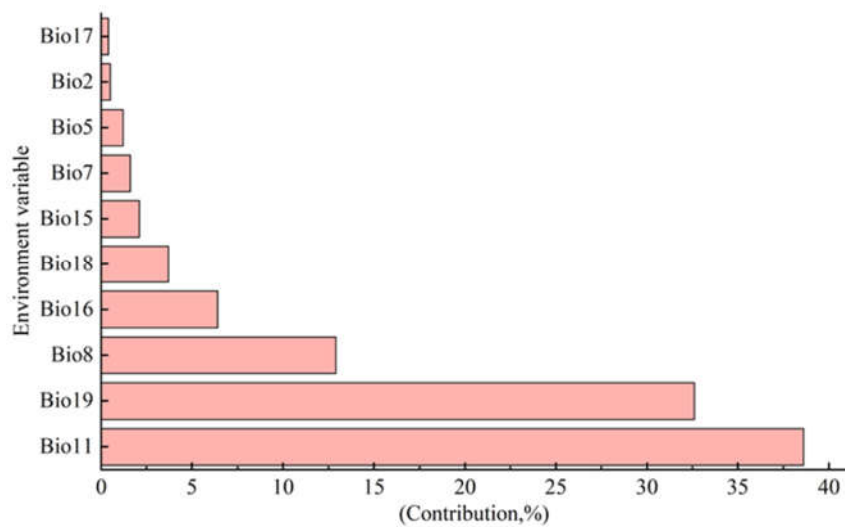

Figure S2. Contribution of different bioclimatic variables to MaxEnt model for *Linepithema humile*.
